# Supplementary material for: Three cobalt(ii) coordination polymers based on V-shaped aromatic polycarboxylates and rigid bis(imidazole) ligand: syntheses, crystal structures, physical properties and theoretical studies
Source: Royal Society of Chemistry journal article supplement (doi:10.1039/c2ce26606g), 2012-11-30
Supplement: c2ce26606g.pdf [file c2ce26606g.pdf]

# **Three cobalt(II) coordination polymers based on V-shaped aromatic polycarboxylates and rigid bis(imidazole) ligand: Syntheses, crystal structures, physical properties and theoretical studies**

**Hong Zhou, Guang-Xiang Liu,\* Xiao-Feng Wang and Yan Wang\***

## **Supporting Information**

### **Section-1.**

Figure S1. Infrared spectra of complexes **1** – **3**.

Figure S2. Oscilloscope traces of the SHG signals for the powders of Co(SDBA)(BIMB) (**1**) and urea.

### **Section-2. Computational Outputs**

## Section-1.

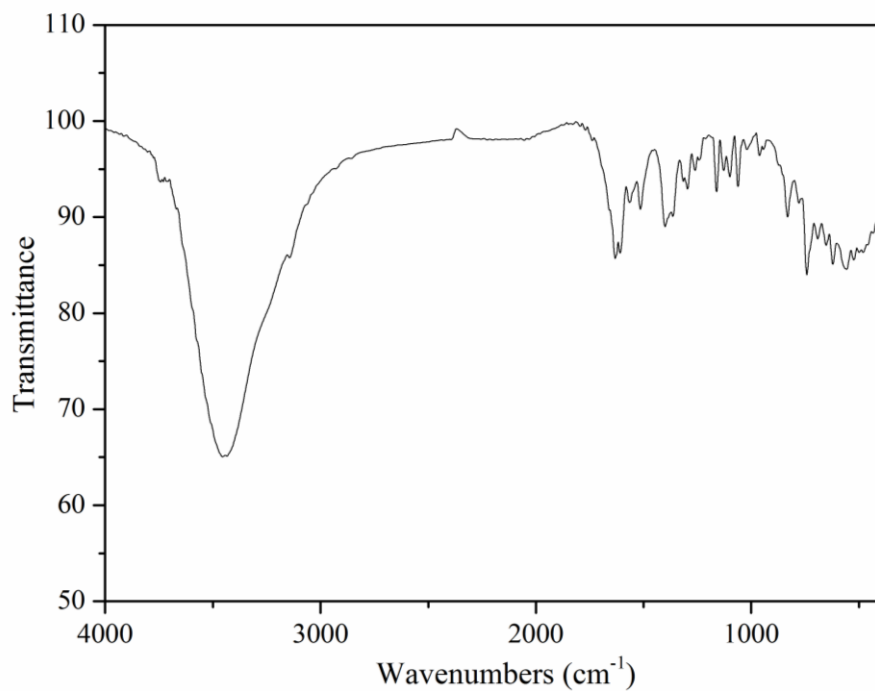

(a)

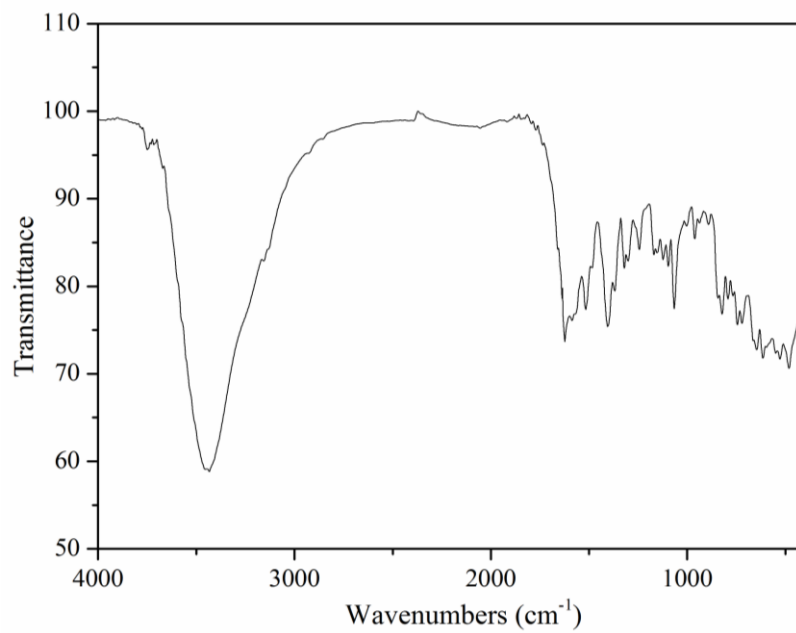

(b)

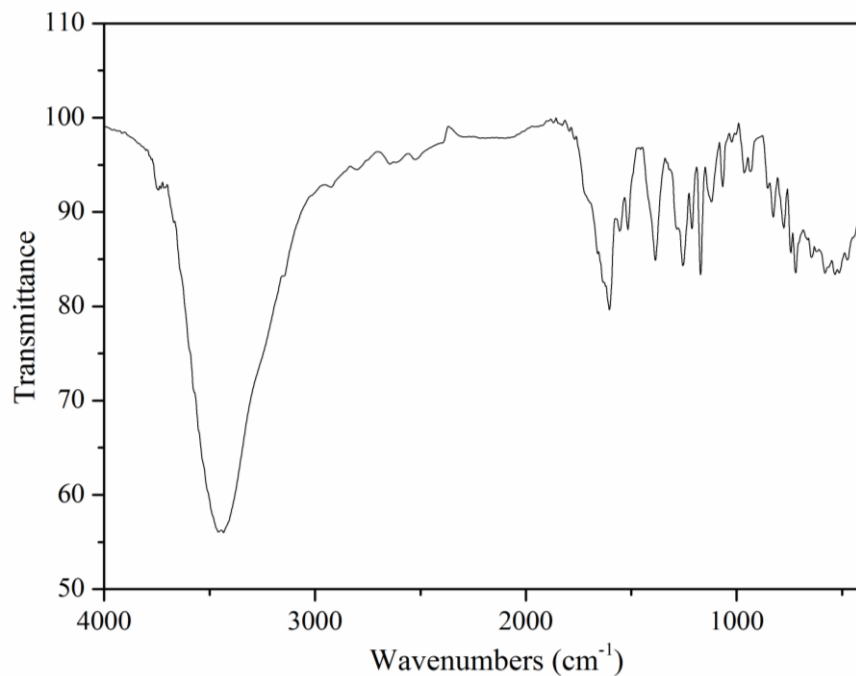

(c)

Figure S1. Infrared spectra of complexes **1** – **3**.

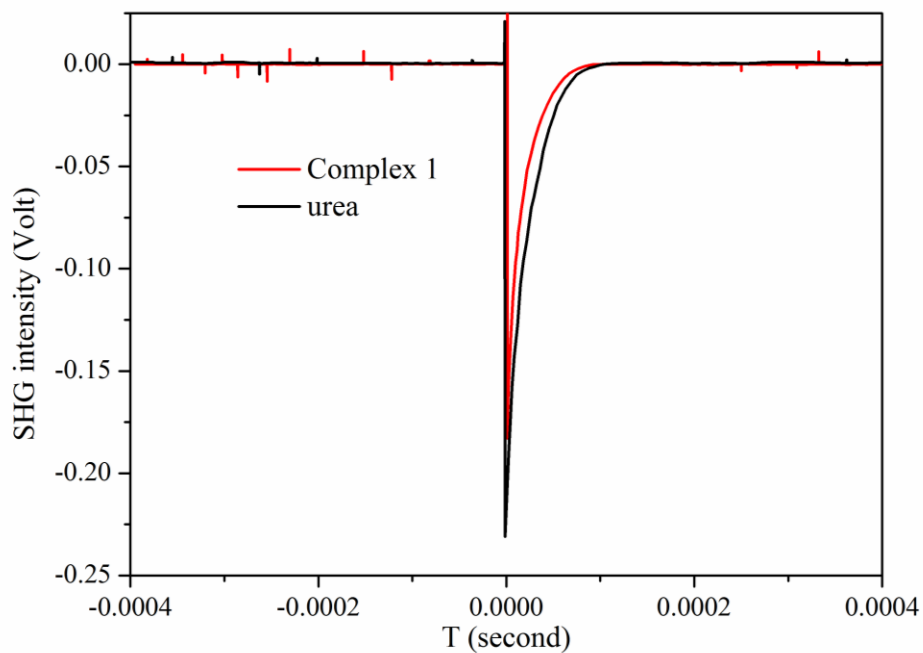

Figure S2. Oscilloscope traces of the SHG signals for the powders of Co(SDBA)(BIMB) (**1**) and urea.

## Section-2. Computational Outputs

### Complex 1 BIMB opt

-----  
# opt freq b3lyp/6-311++g geom=connectivity  
-----

Stoichiometry C18H14N4  
Framework group C1[X(C18H14N4)]  
Deg. of freedom 102  
Full point group C1 NOp 1  
Largest Abelian subgroup C1 NOp 1  
Largest concise Abelian subgroup C1 NOp 1

Standard orientation:

-----

| Center<br>Number | Atomic<br>Number | Atomic<br>Type | Coordinates (Angstroms) |           |           |
|------------------|------------------|----------------|-------------------------|-----------|-----------|
|                  |                  |                | X                       | Y         | Z         |
| 1                | 7                | 0              | -7.034264               | 0.614092  | -0.387739 |
| 2                | 7                | 0              | -4.949647               | -0.000548 | -0.099902 |
| 3                | 7                | 0              | 4.960804                | -0.050493 | 0.002653  |
| 4                | 7                | 0              | 6.877614                | -0.766613 | -0.780698 |
| 5                | 6                | 0              | -5.796708               | 1.029979  | -0.260493 |
| 6                | 1                | 0              | -5.538070               | 1.923607  | -0.278525 |
| 7                | 6                | 0              | -6.978916               | -0.750166 | -0.307678 |
| 8                | 1                | 0              | -7.711608               | -1.320005 | -0.367758 |
| 9                | 6                | 0              | -5.715236               | -1.140384 | -0.129441 |
| 10               | 1                | 0              | -5.411325               | -2.015005 | -0.042771 |
| 11               | 6                | 0              | -3.516491               | 0.049322  | 0.028661  |
| 12               | 6                | 0              | -2.866165               | 1.239176  | 0.271331  |
| 13               | 1                | 0              | -3.347728               | 2.031505  | 0.350840  |
| 14               | 6                | 0              | -1.498853               | 1.243288  | 0.394484  |
| 15               | 1                | 0              | -1.064571               | 2.049702  | 0.553441  |
| 16               | 6                | 0              | -0.736667               | 0.072593  | 0.289231  |
| 17               | 6                | 0              | -1.423259               | -1.100760 | 0.056726  |
| 18               | 1                | 0              | -0.951616               | -1.898534 | -0.019472 |

-----

|    |   |   |           |           |           |
|----|---|---|-----------|-----------|-----------|
| 19 | 6 | 0 | -2.788861 | -1.112393 | -0.063339 |
| 20 | 1 | 0 | -3.229098 | -1.918200 | -0.209358 |
| 21 | 6 | 0 | 5.621404  | -1.069071 | -0.565409 |
| 22 | 1 | 0 | 5.235640  | -1.887866 | -0.780638 |
| 23 | 6 | 0 | 7.040077  | 0.505251  | -0.302736 |
| 24 | 1 | 0 | 7.836814  | 0.985346  | -0.310243 |
| 25 | 6 | 0 | 5.848501  | 0.958634  | 0.185654  |
| 26 | 1 | 0 | 5.680163  | 1.789822  | 0.566457  |
| 27 | 6 | 0 | 3.535017  | 0.010902  | 0.207799  |
| 28 | 6 | 0 | 2.846765  | -1.074497 | 0.704639  |
| 29 | 1 | 0 | 3.309488  | -1.829137 | 0.989933  |
| 30 | 6 | 0 | 1.477435  | -1.038143 | 0.777312  |
| 31 | 1 | 0 | 1.020733  | -1.775176 | 1.113264  |
| 32 | 6 | 0 | 0.751586  | 0.081858  | 0.357052  |
| 33 | 6 | 0 | 1.479952  | 1.191527  | -0.096025 |
| 34 | 1 | 0 | 1.031145  | 1.968862  | -0.337609 |
| 35 | 6 | 0 | 2.858794  | 1.143650  | -0.189172 |
| 36 | 1 | 0 | 3.328224  | 1.875403  | -0.519349 |

-----  
Rotational constants (GHZ):      1.7817952      0.0827816      0.0800392

SCF Done: E(RB3LYP) = -720.9155202325      A.U. after 16 cycles

Convrg = 0.4468D-08      -V/T = 1.9980

Electronic spatial extent (au): <R\*\*2> = 12306.9444

Charge = 0.0000 electrons

Dipole moment (field-independent basis, Debye):

X= 0.0009    Y= 0.0006    Z= 1.1667    Tot= 1.1667

Quadrupole moment (field-independent basis, Debye-Ang):

XX= -205.3391    YY= -115.2250    ZZ= -134.3105

XY= 23.3861    XZ= -0.0112    YZ= 0.0005

Traceless Quadrupole moment (field-independent basis, Debye-Ang):

XX= -53.7142    YY= 36.3999    ZZ= 17.3143

XY= 23.3861    XZ= -0.0112    YZ= 0.0005

Octapole moment (field-independent basis, Debye-Ang\*\*2):

|              |               |               |               |
|--------------|---------------|---------------|---------------|
| XXX = 0.0380 | YYY = 0.0058  | ZZZ = -1.5775 | XYY = 0.0079  |
| XXY = 0.0350 | XXZ = 87.2963 | XZZ = -0.0065 | YZZ = -0.0018 |
| YYZ = 2.0691 | XYZ = 5.2659  |               |               |

Hexadecapole moment (field-independent basis, Debye-Ang\*\*3):

|                    |                   |                   |                  |
|--------------------|-------------------|-------------------|------------------|
| XXXX = -21949.1781 | YYYY = -798.4690  | ZZZZ = -277.1209  | XXXY = 1671.9456 |
| XXXZ = -0.5465     | YYXX = 17.5129    | YYYZ = -0.0007    | ZZZX = -0.0185   |
| ZZZY = -0.0035     | XXYY = -2782.1019 | XXZZ = -2925.5086 | YYZZ = -179.8737 |
| XXYZ = 0.0306      | YYXZ = -0.0254    | ZZXY = -1.7442    |                  |

N-N= 1.497489721633D+03 E-N=-5.115089149787D+03 KE= 9.100449486227D+02

Zero-point correction= 0.284228 (Hartree/Particle)

Thermal correction to Energy= 0.300748

Thermal correction to Enthalpy= 0.301692

Thermal correction to Gibbs Free Energy= 0.237398

Sum of electronic and zero-point Energies= -723.014145

Sum of electronic and thermal Energies= -722.997625

Sum of electronic and thermal Enthalpies= -722.996681

Sum of electronic and thermal Free Energies= -723.060975

\*\*\*\*\*

## Complex 2 BIMB-1 opt

-----

# opt freq b3lyp/6-311++g geom=connectivity

-----

Stoichiometry C18H14N4

Framework group C1[X(C18H14N4)]

Deg. of freedom 102

Full point group C1 NOp 1

Largest Abelian subgroup C1 NOp 1

Largest concise Abelian subgroup C1 NOp 1

Standard orientation:

---

| Center<br>Number | Atomic<br>Number | Atomic<br>Type | Coordinates (Angstroms) |           |           |
|------------------|------------------|----------------|-------------------------|-----------|-----------|
|                  |                  |                | X                       | Y         | Z         |
| 1                | 7                | 0              | 7.033968                | -0.835987 | -0.164125 |
| 2                | 7                | 0              | 4.981270                | -0.020503 | 0.039267  |
| 3                | 7                | 0              | -5.005248               | 0.001998  | 0.071701  |
| 4                | 7                | 0              | -7.008848               | -0.653348 | 0.654912  |
| 5                | 6                | 0              | 5.758249                | -1.063542 | -0.346226 |
| 6                | 1                | 0              | 5.421470                | -1.854548 | -0.702009 |
| 7                | 6                | 0              | 7.083173                | 0.424736  | 0.368448  |
| 8                | 1                | 0              | 7.862178                | 0.867821  | 0.617206  |
| 9                | 6                | 0              | 5.807221                | 0.939536  | 0.480700  |
| 10               | 1                | 0              | 5.568657                | 1.780675  | 0.797425  |
| 11               | 6                | 0              | 3.550011                | 0.032920  | -0.025735 |
| 12               | 6                | 0              | 2.891512                | 1.225454  | 0.021166  |
| 13               | 1                | 0              | 3.375470                | 2.015953  | 0.092656  |
| 14               | 6                | 0              | 1.498307                | 1.271068  | -0.037014 |
| 15               | 1                | 0              | 1.067564                | 2.095525  | -0.008431 |
| 16               | 6                | 0              | 0.747492                | 0.118640  | -0.135091 |
| 17               | 6                | 0              | 1.447530                | -1.064103 | -0.175602 |
| 18               | 1                | 0              | 0.971684                | -1.859506 | -0.247555 |
| 19               | 6                | 0              | 2.819367                | -1.123170 | -0.114838 |
| 20               | 1                | 0              | 3.251088                | -1.946364 | -0.131833 |
| 21               | 6                | 0              | -5.715008               | -0.765204 | 0.896888  |
| 22               | 1                | 0              | -5.347691               | -1.308466 | 1.556850  |
| 23               | 6                | 0              | -7.093929               | 0.223371  | -0.370127 |
| 24               | 1                | 0              | -7.883671               | 0.505633  | -0.771115 |
| 25               | 6                | 0              | -5.840261               | 0.628541  | -0.724004 |
| 26               | 1                | 0              | -5.621095               | 1.232041  | -1.396699 |
| 27               | 6                | 0              | -3.544738               | 0.065398  | 0.012057  |
| 28               | 6                | 0              | -2.868066               | 1.233869  | 0.006717  |
| 29               | 1                | 0              | -3.337945               | 2.034958  | 0.053910  |

|    |   |   |           |           |           |
|----|---|---|-----------|-----------|-----------|
| 30 | 6 | 0 | -1.491445 | 1.261471  | -0.066896 |
| 31 | 1 | 0 | -1.059192 | 2.085081  | -0.084698 |
| 32 | 6 | 0 | -0.747706 | 0.131206  | -0.112475 |
| 33 | 6 | 0 | -1.457509 | -1.034772 | -0.187363 |
| 34 | 1 | 0 | -0.997503 | -1.833808 | -0.308119 |
| 35 | 6 | 0 | -2.843122 | -1.067875 | -0.088462 |
| 36 | 1 | 0 | -3.285475 | -1.885391 | -0.092730 |

-----  
Rotational constants (GHZ):        1.9047656        0.0837698        0.0812239  
SCF Done: E(RB3LYP) = -721.24715788    A.U. after 16 cycles  
          Conv = 0.3335D-08                    -V/T = 1.9975  
Electronic spatial extent (au): <R\*\*2>=            12119.4993  
Charge=                    0.0000 electrons  
Dipole moment (field-independent basis, Debye):  
X=        0.7239    Y=        2.7885    Z=       -0.8755    Tot=        3.0110  
Quadrupole moment (field-independent basis, Debye-Ang):  
XX=        -206.8705    YY=        -115.8763    ZZ=        -131.8034  
XY=        2.8234    XZ=        15.0181    YZ=        0.9555  
Traceless Quadrupole moment (field-independent basis, Debye-Ang):  
XX=        -55.3538    YY=        35.6404    ZZ=        19.7133  
XY=        2.8234    XZ=        15.0181    YZ=        0.9555  
Octapole moment (field-independent basis, Debye-Ang\*\*2):  
XXX = 34.0589        YYY = 5.0588        ZZZ = -0.0051        XYY = 9.1506  
XXY = 193.2464        XXZ = -53.6991        XZZ = -4.7024        YZZ = 0.4242  
YYZ = -1.0606        XYZ = 14.5423  
Hexadecapole moment (field-independent basis, Debye-Ang\*\*3):  
XXXX = -21637.0612    YYYY = -717.3247    ZZZZ = -260.0028    XXXY = 213.4167  
XXXZ = 1041.0023    YYYYX = 9.2696    YYYZ = 10.0583    ZZZX = 2.6992  
ZZZY = -6.9801        XXYX = -2827.7296    XXZZ = -2810.4488    YYZZ = -173.3556  
XXYZ = 35.4291        YYXZ = 18.2226        ZZXY = -8.6304  
N-N= 1.529664586312D+03 E-N=-5.182409005879D+03 KE= 9.153211016914D+02  
Zero-point correction=                    0.273832 (Hartree/Particle)



|                                              |             |
|----------------------------------------------|-------------|
| Thermal correction to Energy=                | 0.297642    |
| Thermal correction to Enthalpy=              | 0.2987532   |
| Thermal correction to Gibbs Free Energy=     | 0.2189321   |
| Sum of electronic and zero-point Energies=   | -721.027536 |
| Sum of electronic and thermal Energies=      | -720.894264 |
| Sum of electronic and thermal Enthalpies=    | -720.896683 |
| Sum of electronic and thermal Free Energies= | -721.057403 |

\*\*\*\*\*

### Complex 2 BIMB-2 opt

-----

# opt freq b3lyp/6-311++g geom=connectivity

-----

Stoichiometry C18H14N4

Framework group C1[X(C18H14N4)]

Deg. of freedom 102

Full point group CI NOp 2

Largest Abelian subgroup CI NOp 2

Largest concise Abelian subgroup CI NOp 2

Standard orientation:

-----

| Center<br>Number | Atomic<br>Number | Atomic<br>Type | Coordinates (Angstroms) |           |           |
|------------------|------------------|----------------|-------------------------|-----------|-----------|
|                  |                  |                | X                       | Y         | Z         |
| 1                | 7                | 0              | 6.962198                | -0.734435 | 0.382384  |
| 2                | 7                | 0              | 4.952749                | 0.049574  | -0.033529 |
| 3                | 6                | 0              | 5.678945                | -0.966834 | 0.432720  |
| 4                | 1                | 0              | 5.309793                | -1.756461 | 0.757344  |
| 5                | 6                | 0              | 7.063707                | 0.494638  | -0.168786 |
| 6                | 1                | 0              | 7.862576                | 0.938937  | -0.339463 |
| 7                | 6                | 0              | 5.852555                | 0.975624  | -0.431380 |

|    |   |   |           |           |           |
|----|---|---|-----------|-----------|-----------|
| 8  | 1 | 0 | 5.658816  | 1.798162  | -0.818287 |
| 9  | 6 | 0 | 3.520164  | 0.061649  | -0.078848 |
| 10 | 6 | 0 | 2.829808  | 1.219216  | 0.174030  |
| 11 | 1 | 0 | 3.282344  | 2.019426  | 0.315980  |
| 12 | 6 | 0 | 1.457754  | 1.175631  | 0.214031  |
| 13 | 1 | 0 | 0.990334  | 1.956848  | 0.400076  |
| 14 | 6 | 0 | 0.745582  | 0.007647  | -0.014286 |
| 15 | 6 | 0 | 1.478115  | -1.141265 | -0.308765 |
| 16 | 1 | 0 | 1.030955  | -1.939570 | -0.477426 |
| 17 | 6 | 0 | 2.850467  | -1.108393 | -0.353345 |
| 18 | 1 | 0 | 3.327490  | -1.876276 | -0.569347 |
| 19 | 7 | 0 | -6.962670 | 0.734284  | -0.382671 |
| 20 | 7 | 0 | -4.953249 | -0.049506 | 0.033276  |
| 21 | 6 | 0 | -5.678129 | 0.966570  | -0.432369 |
| 22 | 1 | 0 | -5.310243 | 1.756443  | -0.757589 |
| 23 | 6 | 0 | -7.063377 | -0.494159 | 0.168934  |
| 24 | 1 | 0 | -7.862240 | -0.938563 | 0.339707  |
| 25 | 6 | 0 | -5.852270 | -0.975164 | 0.431616  |
| 26 | 1 | 0 | -5.658882 | -1.799000 | 0.818060  |
| 27 | 6 | 0 | -3.519320 | -0.062133 | 0.079166  |
| 28 | 6 | 0 | -2.830308 | -1.219147 | -0.174283 |
| 29 | 1 | 0 | -3.282670 | -2.019482 | -0.316170 |
| 30 | 6 | 0 | -1.458226 | -1.175534 | -0.214149 |
| 31 | 1 | 0 | -0.989970 | -1.956445 | -0.399698 |
| 32 | 6 | 0 | -0.746032 | -0.007664 | 0.014040  |
| 33 | 6 | 0 | -1.477293 | 1.140896  | 0.309211  |
| 34 | 1 | 0 | -1.031382 | 1.939686  | 0.477221  |
| 35 | 6 | 0 | -2.850967 | 1.108461  | 0.353092  |
| 36 | 1 | 0 | -3.327154 | 1.876650  | 0.569591  |

-----  
Rotational constants (GHZ):      1.8966639      0.0848095      0.0818475

SCF Done: E(RB3LYP) = -721.0030685      A.U. after    16 cycles

Convg =    0.1489D-08      -V/T =    1.9974

Electronic spatial extent (au): <R\*\*2>=      12008.5714

Charge=                    0.0000 electrons

Dipole moment (field-independent basis, Debye):

X= 0.0194 Y= -0.0010 Z= 0.0006 Tot = 0.0194

Quadrupole moment (field-independent basis, Debye-Ang):

XX= -203.5160 YY= -114.0399 ZZ= -132.9577  
XY= 26.2488 XZ= -13.7339 YZ= 1.3373

Traceless Quadrupole moment (field-independent basis, Debye-Ang):

XX= -53.3448 YY= 36.1313 ZZ= 17.2135  
XY= 26.2488 XZ= -13.7339 YZ= 1.3373

Octapole moment (field-independent basis, Debye-Ang\*\*2):

XXX = 1.3277 YYY = 0.0050 ZZZ = -0.0047 XYY = 0.0103  
XXY = -0.0527 XXZ = 0.0316 XZZ = 0.0384 YZZ = 0.0000  
YYZ = 0.0020 XYZ = -0.0286

Hexadecapole moment (field-independent basis, Debye-Ang\*\*3):

XXXX = -21084.8889 YYYY = -748.8693 ZZZZ = -228.9878 XXXY = 1731.2580  
XXXZ = -840.6860 YYYYX = 45.4392 YYYZ = 3.7797 ZZZX = -2.2505  
ZZZY = 0.1492 XXYY = -2733.4857 XXZZ = -2820.2044 YYZZ = -173.2308  
XXYZ = -3.7152 YYXZ = -29.5609 ZZXY = 6.8936

N-N= 1.532213427619D+03 E-N=-5.187682806955D+03 KE= 9.153675711404D+02

Zero-point correction= 0.265439 (Hartree/Particle)

Thermal correction to Energy= 0.2731245

Thermal correction to Enthalpy= 0.275682

Thermal correction to Gibbs Free Energy= 0.214732

Sum of electronic and zero-point Energies= -721.061358

Sum of electronic and thermal Energies= -720.084597

Sum of electronic and thermal Enthalpies= -720.087646

Sum of electronic and thermal Free Energies= -721.0669821

\*\*\*\*\*

### Complex 3 BIMB opt

-----  
# opt freq b3lyp/6-311++g geom=connectivity  
-----

Stoichiometry C18H14N4  
Framework group C1[X(C18H14N4)]  
Deg. of freedom 102  
Full point group CI NOp 2  
Largest Abelian subgroup CI NOp 2  
Largest concise Abelian subgroup CI NOp 2

Standard orientation:

-----

| Center<br>Number | Atomic<br>Number | Atomic<br>Type | Coordinates (Angstroms) |           |           |
|------------------|------------------|----------------|-------------------------|-----------|-----------|
|                  |                  |                | X                       | Y         | Z         |
| 1                | 7                | 0              | 7.071667                | 0.410372  | 0.517721  |
| 2                | 7                | 0              | 4.964146                | -0.022691 | 0.079489  |
| 3                | 6                | 0              | 5.824888                | 0.498961  | 0.949645  |
| 4                | 1                | 0              | 5.580651                | 0.879230  | 1.762247  |
| 5                | 6                | 0              | 6.989394                | -0.281210 | -0.661466 |
| 6                | 1                | 0              | 7.714867                | -0.519742 | -1.191635 |
| 7                | 6                | 0              | 5.713298                | -0.560759 | -0.935262 |
| 8                | 1                | 0              | 5.393628                | -1.029484 | -1.672409 |
| 9                | 6                | 0              | 3.534954                | -0.013948 | 0.101838  |
| 10               | 6                | 0              | 2.835876                | -1.180971 | 0.385668  |
| 11               | 1                | 0              | 3.298408                | -1.959339 | 0.600404  |
| 12               | 6                | 0              | 1.446205                | -1.186034 | 0.348980  |
| 13               | 1                | 0              | 1.021302                | -1.989674 | 0.546003  |
| 14               | 6                | 0              | 0.755541                | -0.024118 | 0.028519  |
| 15               | 6                | 0              | 1.453741                | 1.144024  | -0.255754 |
| 16               | 1                | 0              | 1.033803                | 1.944615  | -0.474024 |
| 17               | 6                | 0              | 2.843411                | 1.149087  | -0.219067 |
| 18               | 1                | 0              | 3.310830                | 1.930531  | -0.409280 |
| 19               | 7                | 0              | -7.071469               | -0.410866 | -0.517105 |
| 20               | 7                | 0              | -4.963972               | 0.022757  | -0.080097 |
| 21               | 6                | 0              | -5.825356               | -0.499282 | -0.949755 |

|    |   |   |           |           |           |
|----|---|---|-----------|-----------|-----------|
| 22 | 1 | 0 | -5.580514 | -0.878430 | -1.762509 |
| 23 | 6 | 0 | -6.989890 | 0.280668  | 0.661330  |
| 24 | 1 | 0 | -7.715376 | 0.520095  | 1.191998  |
| 25 | 6 | 0 | -5.712632 | 0.561361  | 0.935708  |
| 26 | 1 | 0 | -5.393628 | 1.030259  | 1.672129  |
| 27 | 6 | 0 | -3.533976 | 0.013867  | -0.101703 |
| 28 | 6 | 0 | -2.835826 | 1.181877  | -0.385962 |
| 29 | 1 | 0 | -3.298814 | 1.958940  | -0.600313 |
| 30 | 6 | 0 | -1.446227 | 1.186898  | -0.349219 |
| 31 | 1 | 0 | -1.021687 | 1.989186  | -0.545953 |
| 32 | 6 | 0 | -0.756019 | 0.023676  | -0.028372 |
| 33 | 6 | 0 | -1.454076 | -1.144380 | 0.255790  |
| 34 | 1 | 0 | -1.032896 | -1.944738 | 0.474215  |
| 35 | 6 | 0 | -2.843725 | -1.149532 | 0.219062  |
| 36 | 1 | 0 | -3.310669 | -1.929570 | 0.409172  |

-----  
Rotational constants (GHZ):        1.8525071        0.0836826        0.0823395  
SCF Done: E(RB3LYP) = -721.0438121        A.U. after 16 cycles  
          Convrg = 0.3385D-08                        -V/T = 1.9981  
Electronic spatial extent (au): <R\*\*2>=            12056.2705  
Charge=                        0.0000 electrons  
Dipole moment (field-independent basis, Debye):  
X= -0.0016    Y= 0.0012    Z= -0.0029    Tot= 0.0036  
Quadrupole moment (field-independent basis, Debye-Ang):  
XX= -215.8740    YY= -117.6729    ZZ= -126.2153  
XY= -14.6757    XZ= -18.9910    YZ= -0.5499  
Traceless Quadrupole moment (field-independent basis, Debye-Ang):  
XX= -62.6199    YY= 35.5811    ZZ= 27.0388  
XY= -14.6757    XZ= -18.9910    YZ= -0.5499  
Octapole moment (field-independent basis, Debye-Ang\*\*2):  
XXX= -0.1552    YYY= 0.0070    ZZZ= -0.0207    XYY= 0.0059  
XXY= 0.0663    XXZ= -0.1572    XZZ= -0.0137    YZZ= 0.0070  
YYZ= 0.0022    XYZ= -0.0022  
Hexadecapole moment (field-independent basis, Debye-Ang\*\*3):  
XXXX= -22429.9741    YYYY= -615.0838    ZZZZ= -380.0252    XXXY= -957.8237

|       |            |       |            |       |            |       |           |
|-------|------------|-------|------------|-------|------------|-------|-----------|
| XXXZ= | -1408.3410 | YYYX= | -5.3428    | YYYZ= | -22.1888   | ZZZX= | -5.9182   |
| ZZZY= | 21.0554    | XXYY= | -2802.9937 | XXZZ= | -2633.3697 | YYZZ= | -170.4930 |
| XXYZ= | 63.1761    | YYXZ= | -7.0767    | ZZXY= | -19.8814   |       |           |

N-N= 1.523477660357D+03 E-N=-5.169931198646D+03 KE= 9.147036850957D+02

Zero-point correction= 0.275345 (Hartree/Particle)

Thermal correction to Energy= 0.294834

Thermal correction to Enthalpy= 0.286739

Thermal correction to Gibbs Free Energy= 0.216783

Sum of electronic and zero-point Energies= -720.012456

Sum of electronic and thermal Energies= -720.942178

Sum of electronic and thermal Enthalpies= -720.943867

Sum of electronic and thermal Free Energies= -721.059612
